# Supplementary material for: Mechanically robust, multifunctional and nanofibrous membranes for tuberculosis elimination
Source: Royal Society of Chemistry journal article supplement (doi:10.1039/c7ra08762d), 2017-01-01
Supplement: c7ra08762d1.pdf [file c7ra08762d1.pdf]

# Mechanically Robust, Multifunctional and Nanofibrous Membranes for Tuberculosis Elimination

Nakarin Subjaleearndee and Varol Intasanta\*

*Nano Functional Textile Laboratory, National Nanotechnology Center, National Science and  
Technology Development Agency, 111 Phahonyothin Road, Klong Nueng, Klong  
Luang, Pathumthani, 12120, Thailand*

*Phone: +66-2564-7100 ext. 6580, Fax : +66-2564-6981, E-mail: [varol@nanotec.or.th](mailto:varol@nanotec.or.th)*

## Supplementary Information

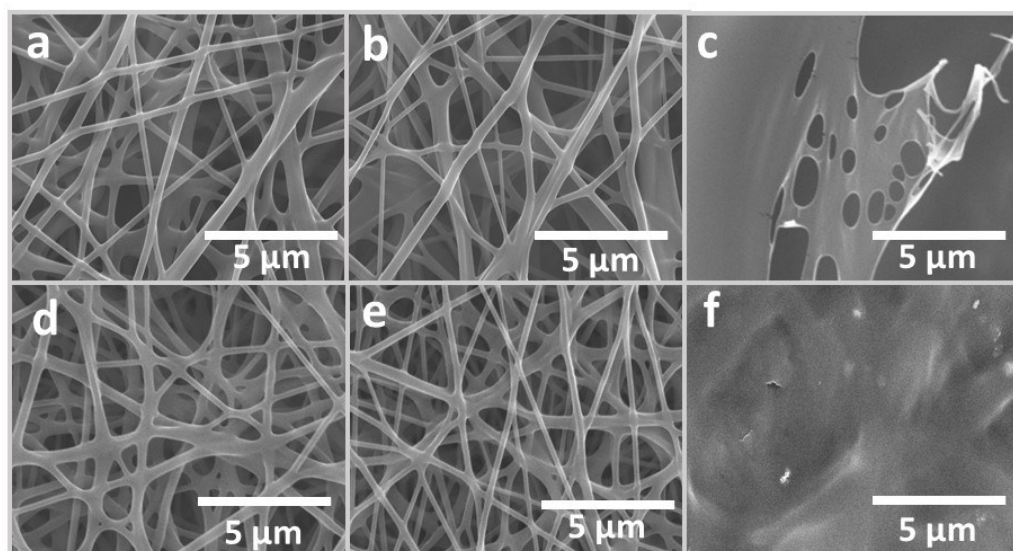

**Figure S1.** SEM images of (a) GA 2.5, (b) GA 2.5 after heat treatment at 140 °C for an hour and (c) GA 2.5 after heat treatment then immersion in water. SEM images of (d) GA 5, (e) GA 5 after heat treatment at 140 °C for an hour and (f) GA 5 after heat treatment then immersion in water.

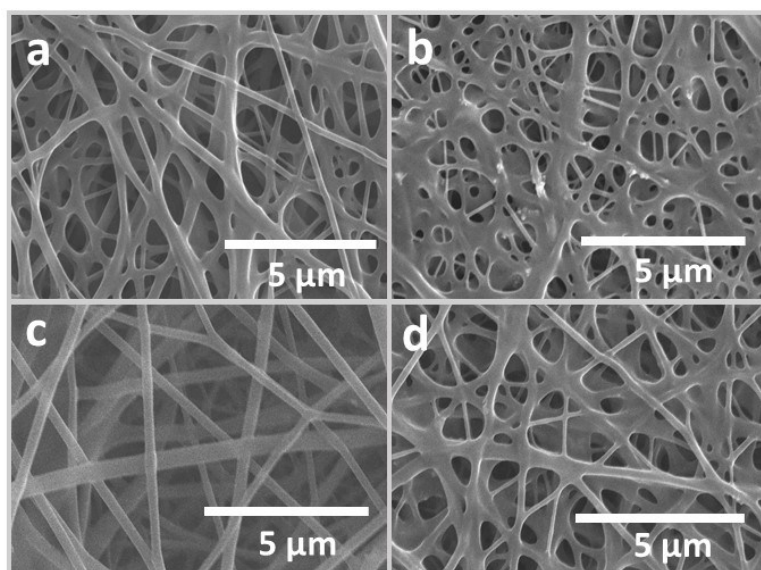

**Figure S2.** SEM images of (a) GA 10, (b) GA 10\_A, (c) PF 10\_A and (d) GA/PF 10\_A nanofibers after heat treatment at 140 °C for an hour.

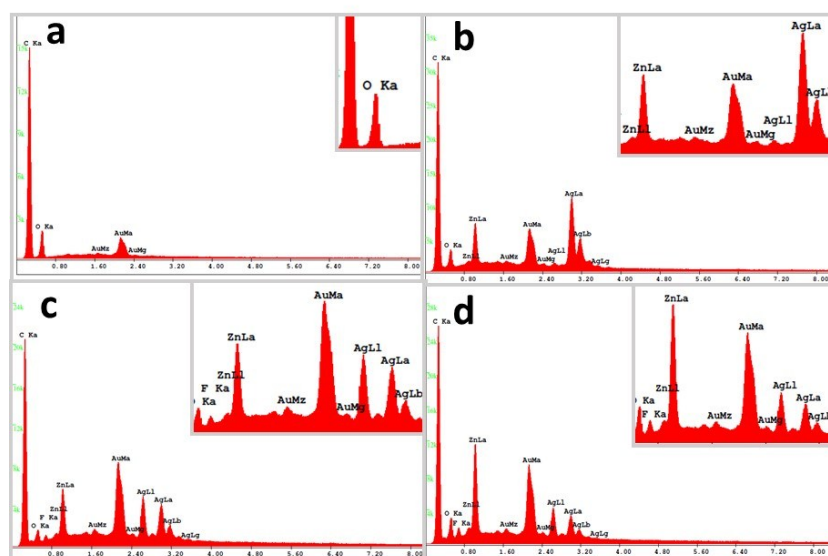

**Figure S3.** SEM-EDX of (a) GA 10, (b) GA 10\_A, (c) PF 10\_A and (d) GA/PF 10\_A nanofibers.

**Table S1** Tensile strength and elongation at break of the nanomembrane before and after exposure to simulated weathering condition.

| Nanofibers | Before exposure to simulated weathering condition |                                   | After exposure to simulated weathering condition |                                   |
|------------|---------------------------------------------------|-----------------------------------|--------------------------------------------------|-----------------------------------|
|            | Average tensile strength (N)                      | Average elongation percentage (%) | Average tensile strength (N)                     | Average elongation percentage (%) |
| GA 10      | 5.27                                              | 54.45                             | 0.44                                             | 21.67                             |
| GA 10_A    | 2.98                                              | 31.11                             | 10.67                                            | 35.00                             |
| PF 10_A    | 2.19                                              | 28.33                             | 3.85                                             | 65                                |
| GA/PF 10_A | 4.08                                              | 35.56                             | 6.68                                             | 73.61                             |

**Table S2** UPF, UV-A and UV-B transmittance values of the nanomembrane at dry and wet condition.

| Nanofibers | UPF |     | UV-A transmittance<br>Percentage (%) |      | UV-B transmittance<br>Percentage (%) |      |
|------------|-----|-----|--------------------------------------|------|--------------------------------------|------|
|            | Dry | Wet | Dry                                  | Wet  | Dry                                  | Wet  |
| GA 10      | 7   | 3   | 23.1                                 | 43.7 | 12.4                                 | 27.2 |
| GA 10_A    | 50+ | 32  | 0.2                                  | 2.0  | 0.2                                  | 2.5  |
| PF 10_A    | 50+ | 50+ | <0.1                                 | <0.1 | <0.1                                 | <0.1 |
| GA/PF 10_A | 50+ | 50+ | 0.1                                  | 0.1  | 0.1                                  | 0.1  |

**Table S3** Anti-bacterial efficiency of the nanomembrane after evaluation by AATCC TM 100:2004 and AATCC TM 147:2011 standard testing method.

| Nanofibers | AATCC TM 100:2004 |                  | AATCC TM 147:2011 |                  |                         |                  |
|------------|-------------------|------------------|-------------------|------------------|-------------------------|------------------|
|            | <i>Step. (+)</i>  | <i>Klep. (-)</i> | Bact. Growth      |                  | Zone of inhibition (mm) |                  |
|            |                   |                  | <i>Step. (+)</i>  | <i>Klep. (-)</i> | <i>Step. (+)</i>        | <i>Klep. (-)</i> |
| GA 10      | >99.95            | >99.93           | Growth            | Growth           | 0                       | 0                |
| GA 10_A    | >99.94            | >99.90           | No Growth         | No Growth        | 0.6                     | 0                |
| PF 10_A    | >99.92            | >99.95           | No Growth         | No Growth        | 2.2                     | 1.2              |
| GA/PF 10_A | >99.95            | >99.93           | No Growth         | No Growth        | 3.0                     | 2.8              |

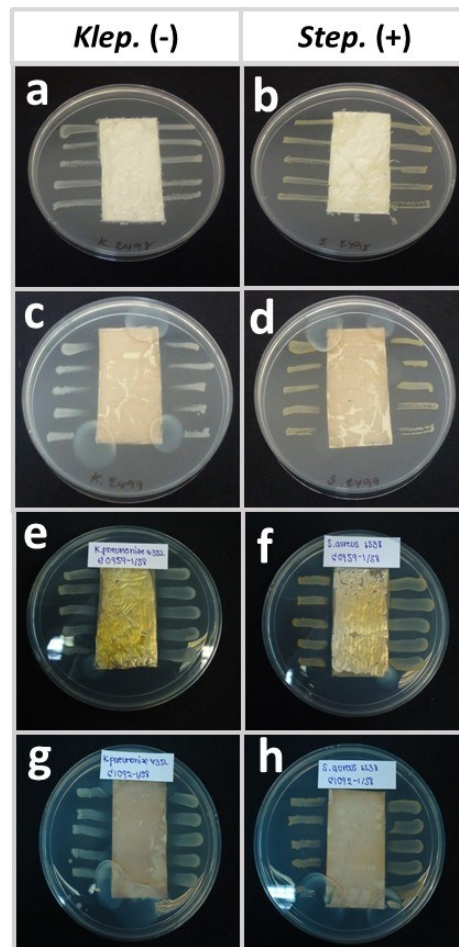

**Figure S5.** Pictures of anti-bacterial testing procedure and clear zone measurement by AATCC 147:2011 standard testing method of (a and b) GA 10, (c and d) GA 10\_A, (e and f) PF 10\_A and (g and h) GA/PF 10\_A nanomembrane.

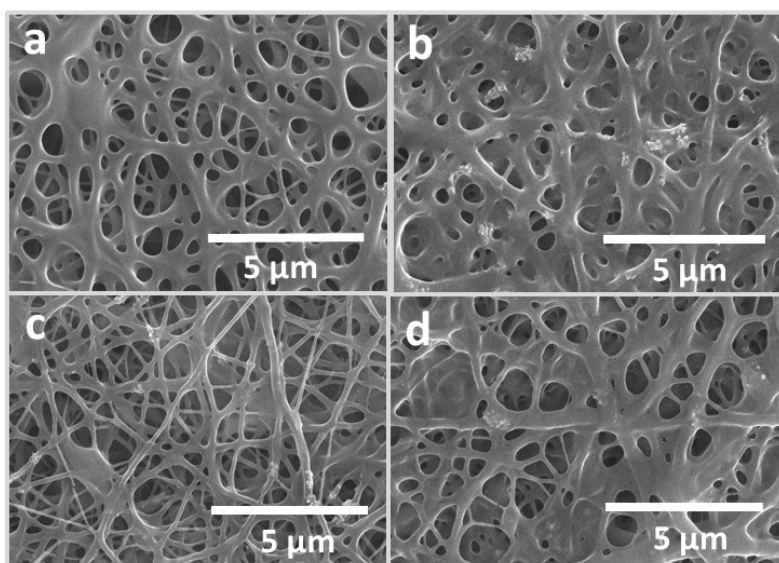

**Figure S6.** SEM images of (a) GA 10, (b) GA 10\_A, (c) PF 10\_A and (d) GA/PF 10\_A nanofibers after water filtration experiment.

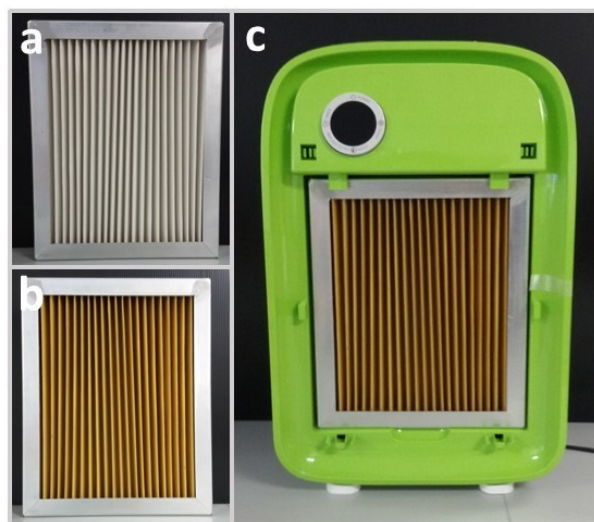

**Figure S7.** Pictures of nanofilter after pleating and framed at (a) back side, (b) front side and (c) nanofilter assemble inside the commercial air filtration machine.

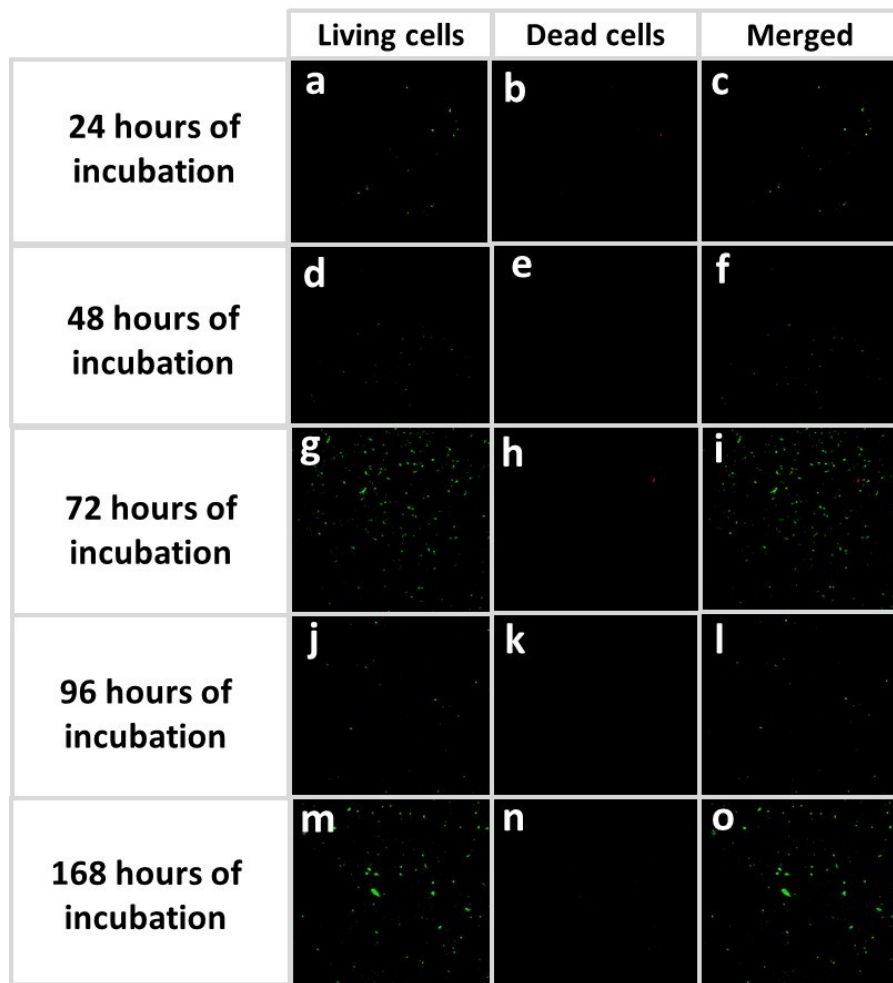

**Figure S8.** Confocal laser scanning microscopic images showing dead (Red) and living (Green) *M. tuberculosis* H37Ra cells on the GA 10 nanofilter (Control) after aerosol droplets filtration inside the biosafety cabinet class III at (a-c) 24, (d-f) 48, (g-i) 72, (j-l) 96 and (m-o) 168 hours of incubation.

|                         | Living cells                                                                                | Dead cells                                                                                  | Merged                                                                                        |
|-------------------------|---------------------------------------------------------------------------------------------|---------------------------------------------------------------------------------------------|-----------------------------------------------------------------------------------------------|
| 24 hours of incubation  | <b>a</b> 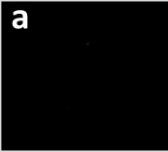  | <b>b</b> 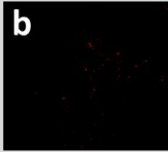  | <b>c</b> 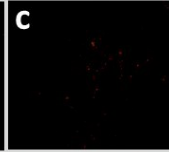  |
| 48 hours of incubation  | <b>d</b> 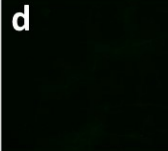  | <b>e</b> 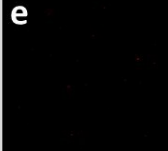  | <b>f</b> 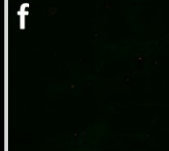  |
| 72 hours of incubation  | <b>g</b> 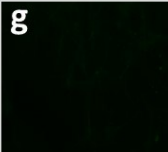  | <b>h</b> 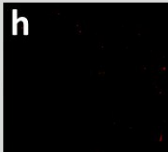  | <b>i</b> 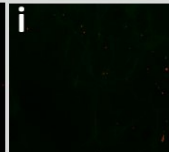  |
| 96 hours of incubation  | <b>j</b> 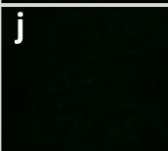  | <b>k</b> 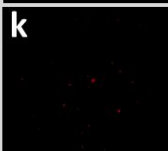  | <b>l</b> 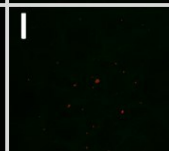  |
| 168 hours of incubation | <b>m</b> 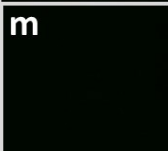 | <b>n</b> 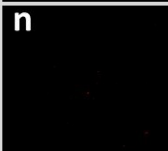 | <b>o</b> 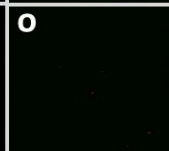 |

**Figure S9.** Confocal laser scanning microscopic images showing dead (Red) and living (Green) *M. tuberculosis* H37Ra cells on the GA/PF 10\_A nanofilter after aerosol droplet filtration inside the biosafety cabinet class III at (a-c) 24, (d-f) 48, (g-i) 72, (j-l) 96 and (m-o) 168 hours of incubation.
